# Supplementary material
Source: PubMed Central journal article supplement (PMC2647681)
Supplement: blood-2008-05-156752_1.pdf [file blood-2008-05-156752_1.pdf]

## Gene Forward Primer Reverse Primer

|                |                           |                            |
|----------------|---------------------------|----------------------------|
| $\beta$ -Actin | gctctttccagccttcctt       | cttctgcatcctgtcagcaa       |
| Aldh1a1 A      | gacaggctttccagattggctc    | aagactttcccaccattgagtg     |
| Aldh1a1 B      | gtctgtagatgatgtgatcaagag  | agacatcttgaatccaccgaagg    |
| Aldh1a1 C      | gtgcagcccacagtggttctccaac | agacatcttgaatccaccgaagg    |
| Aldh1a1 D      | ctcgggtggattcaagatgtctgg  | gatgtgtagccactgctgagag     |
| Aldh1a2        | atgcggattgccaaggagg       | tgaagacagctgctacaagtcc     |
| Aldh1a3        | cacaggctccatttgggtgg      | cagctttgaggaagaagcc        |
| Aldh1a7        | gctgtccctgtccaatgccatttg  | ggtgactgtatgagatgtacagccac |
| Aldh1b1        | gctgaactgaccggagaacg      | taagaggtagtctgccttg        |
| Aldh1l1        | tcatctctcggtttctgatgg     | gacatacagggcctgttgatatcc   |
| Aldh1l2        | ggaaccactgtgttcacagg      | gcaacacccatcgatgtcc        |
| Aldh2          | tgaagacggttactgtcaaagtgc  | agtgtgtgtggcggttttctc      |
| Aldh3a1        | gatgccattgtgtgttctg       | ccaccgcttgatgtctctgc       |
| Aldh3a2        | gagatggatgaggccacacg      | acagacactattggaagaattggctc |
| Aldh3b1        | ccttctccaagagaagccagg     | ggagaactgcccgtgttacc       |
| Aldh3b2        | gctttgctgtgatgttggagg     | tcgcagttgtcatccacatagc     |
| Aldh4a1        | tgctggcaacttctacatcaacg   | cctcctggctgtcattgggtc      |
| Aldh5a1        | ggacatgctctgcatcactgag    | cctcagctgcatttgcgatgg      |
| Aldh6a1        | ggaactgccatcttcaccacc     | ctggaatggggacattcacacc     |
| Aldh7a1        | gaccacctgccttctgaaag      | ttccagccaaacacagccac       |
| Aldh8a1        | ctgaccatcagccaacatgg      | caccctcaccacagagaatcc      |
| Aldh9a1        | ttggtggctacaagaagtcagg    | gcttccctgggttcaaaagg       |
| Aldh16a1       | ggatatagctcctctgtttcctgc  | cccacacagacttgaggttcc      |
| Aldh18a1       | gagttcttctccagcatgtgg     | gtggattcgagatgtgctgattcc   |
